# Supplementary material for: Synbiotics Easing Renal Failure by Improving Gut Microbiology II (SYNERGY II): A Feasibility Randomized Controlled Trial
Source: MDPI journal article supplement (doi:10.3390/nu13124481), 2021-12-15

## **Supplemental Material**

Item S1 Supplemental Tables -2-

Item S2 Supplemental Figures -3-

## Item S1: Supplemental Tables

Supplemental Table S1: Bacterial taxa, by relative abundance at end of intervention.

| Taxonomy                          | Abundance Placebo<br>(mean $\pm$ SD) | Abundance Synbiotics<br>(mean $\pm$ SD) | Fold<br>Change | FDR   | P-value<br>(clr) |
|-----------------------------------|--------------------------------------|-----------------------------------------|----------------|-------|------------------|
| <b>Phylum</b>                     |                                      |                                         |                |       |                  |
| Actinobacteria                    | 4.6 $\pm$ 5.1                        | 3.3 $\pm$ 3.5                           | -1.4           | 0.061 | 0.011            |
| Euryarchaeota                     | 0.097 $\pm$ 0.25                     | 0.086 $\pm$ 0.16                        | -1.1           | 0.061 | 0.0079           |
| <b>Family</b>                     |                                      |                                         |                |       |                  |
| Streptococcaceae                  | 1.3 $\pm$ 2.8                        | 0.3 $\pm$ 0.34                          | -4.3           | 0.065 | 0.0014           |
| Methanobacteriaceae               | 0.097 $\pm$ 0.25                     | 0.086 $\pm$ 0.16                        | -1.1           | 0.11  | 0.0049           |
| Bifidobacteriaceae                | 2.3 $\pm$ 4.0                        | 2.5 $\pm$ 3.3                           | 1.1            | 0.21  | 0.014            |
| CAG-272                           | 0.04 $\pm$ 0.091                     | 0.024 $\pm$ 0.06                        | -1.7           | 0.41  | 0.037            |
| <b>Genus</b>                      |                                      |                                         |                |       |                  |
| Streptococcus                     | 1.3 $\pm$ 2.8                        | 0.3 $\pm$ 0.34                          | -4.3           | 0.20  | 0.0015           |
| Methanobrevibacter_A              | 0.097 $\pm$ 0.25                     | 0.086 $\pm$ 0.16                        | -1.1           | 0.32  | 0.006            |
| Ruminiclostridium_C               | 0.35 $\pm$ 0.5                       | 0.21 $\pm$ 0.26                         | -1.7           | 0.32  | 0.0073           |
| Bifidobacterium                   | 2.3 $\pm$ 4.0                        | 2.5 $\pm$ 3.3                           | 1.1            | 0.43  | 0.013            |
| Eubacterium_G                     | 0.033 $\pm$ 0.064                    | 0.034 $\pm$ 0.068                       | 1              | 0.56  | 0.022            |
| CAG-226                           | 0.1 $\pm$ 0.26                       | 0.11 $\pm$ 0.32                         | 1.1            | 0.56  | 0.034            |
| Intestinimonas                    | 0.022 $\pm$ 0.079                    | 0.059 $\pm$ 0.15                        | 2.7            | 0.56  | 0.038            |
| <b>Species</b>                    |                                      |                                         |                |       |                  |
| s_Bifidobacterium animalis        | 0.55 $\pm$ 2.7                       | 1.3 $\pm$ 2.8                           | 2.4            | 0.04  | 0.00017          |
| s_Bacteroides cellulosilyticus    | 0.49 $\pm$ 1.6                       | 0.28 $\pm$ 1.1                          | -1.7           | 0.47  | 0.0039           |
| s_Blautia MIC1901                 | 0.039 $\pm$ 0.12                     | 0.093 $\pm$ 0.19                        | 2.4            | 0.47  | 0.0084           |
| s_Ruminiclostridium_C MIC856      | 0.35 $\pm$ 0.5                       | 0.2 $\pm$ 0.27                          | -1.7           | 0.47  | 0.009            |
| s_Duodenibacillus MIC4494         | 0.22 $\pm$ 1.1                       | 0.24 $\pm$ 0.74                         | 1.1            | 0.47  | 0.013            |
| s_Streptococcus thermophilus      | 0.21 $\pm$ 0.89                      | 0.22 $\pm$ 0.33                         | 1              | 0.47  | 0.015            |
| s_Subdoligranulum MIC5784         | 0.055 $\pm$ 0.14                     | 0.13 $\pm$ 0.23                         | 2.4            | 0.47  | 0.018            |
| s_Alistipes senegalensis          | 0.014 $\pm$ 0.039                    | 0.011 $\pm$ 0.036                       | -1.3           | 0.47  | 0.019            |
| s_Acidaminococcus intestini       | 0.039 $\pm$ 0.2                      | 0.034 $\pm$ 0.1                         | -1.1           | 0.47  | 0.019            |
| s_Eubacterium_E hallii            | 0.38 $\pm$ 0.5                       | 0.095 $\pm$ 0.18                        | -4             | 0.47  | 0.023            |
| s_Bacteroides_B vulgatus          | 1.7 $\pm$ 2.6                        | 3.5 $\pm$ 4.0                           | 2.1            | 0.47  | 0.024            |
| s_Prevotella MIC849               | 0.55 $\pm$ 1.0                       | 0.071 $\pm$ 0.21                        | -7.7           | 0.47  | 0.026            |
| s_CAG-312 MIC3688                 | 0.0056 $\pm$ 0.021                   | 0.028 $\pm$ 0.097                       | 5              | 0.47  | 0.026            |
| s_Methanobrevibacter_A smithii    | 0.06 $\pm$ 0.17                      | 0.071 $\pm$ 0.15                        | 1.2            | 0.47  | 0.028            |
| s_CAG-226 MIC3942                 | 0.1 $\pm$ 0.26                       | 0.11 $\pm$ 0.32                         | 1.1            | 0.53  | 0.036            |
| s_Alistipes MIC3765               | 0.038 $\pm$ 0.087                    | 0.24 $\pm$ 0.69                         | 6.3            | 0.53  | 0.036            |
| s_Butyricimonas MIC1139           | 0.0023 $\pm$ 0.013                   | 0.013 $\pm$ 0.028                       | 5.7            | 0.53  | 0.042            |
| s_CAG-103 MIC5000                 | 0.25 $\pm$ 0.61                      | 0.11 $\pm$ 0.35                         | -2.3           | 0.53  | 0.044            |
| s_Ruthenibacterium lactatiformans | 0.85 $\pm$ 2.0                       | 0.065 $\pm$ 0.19                        | -13            | 0.53  | 0.049            |
| s_CAG-103 MIC465                  | 0.0073 $\pm$ 0.04                    | 0.075 $\pm$ 0.14                        | 10             | 0.53  | 0.049            |

## **Item S2: Supplemental Figure Legends**

Supplemental Figure S1: A) Richness of the gastrointestinal microbiota, by species.

B) Diversity of gastrointestinal microbiota, by species.

Supplemental Figure S2: Redundancy analysis (RDA) of gut microbiome composition by condition.

Supplemental Figure S3: Functional groups of the gastrointestinal microbiota differentiating between participants after placebo or synbiotic supplementation as identified by sparse Partial Least Squares Discriminant Analysis (sPLS-DA).

Supplemental Figure S1A

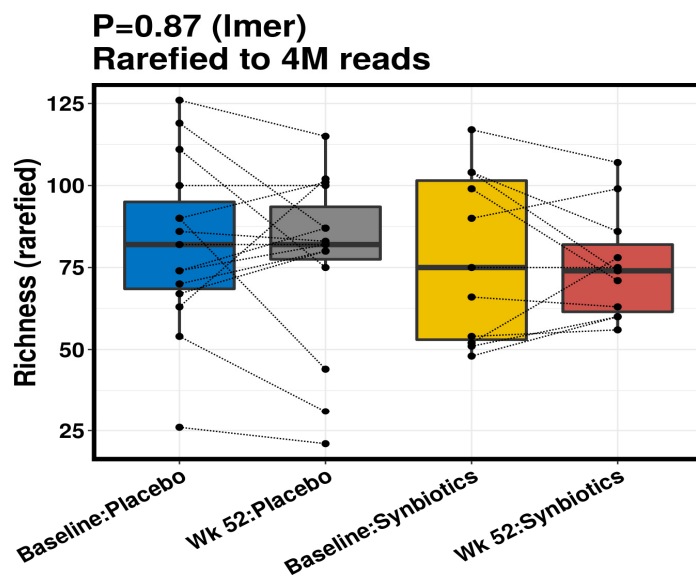

Supplemental Figure S1B

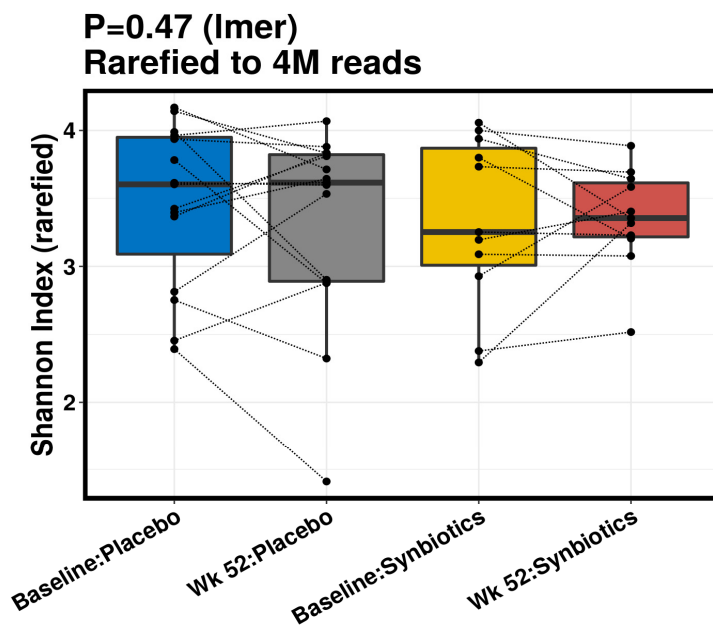

## Supplemental Figure S2

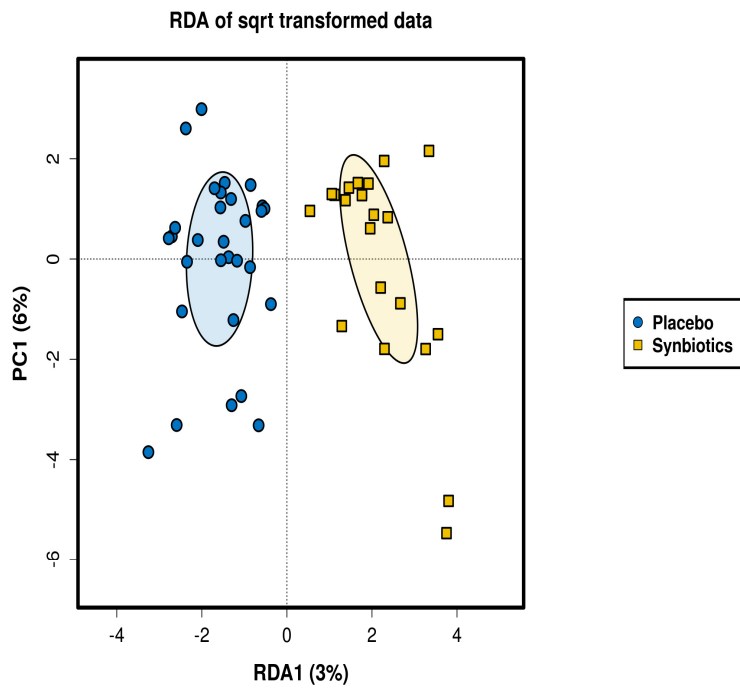

Supplemental Figure S3

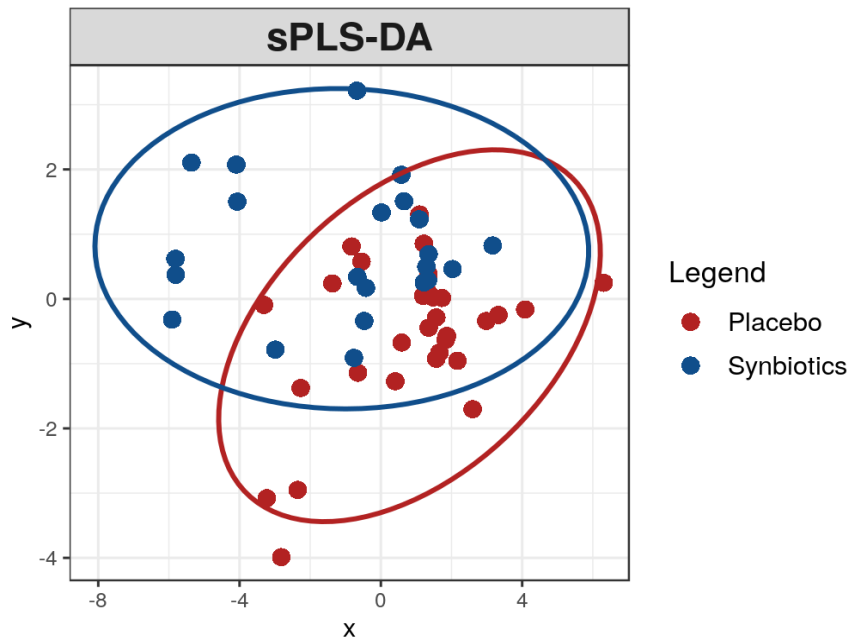

sPLS-DA

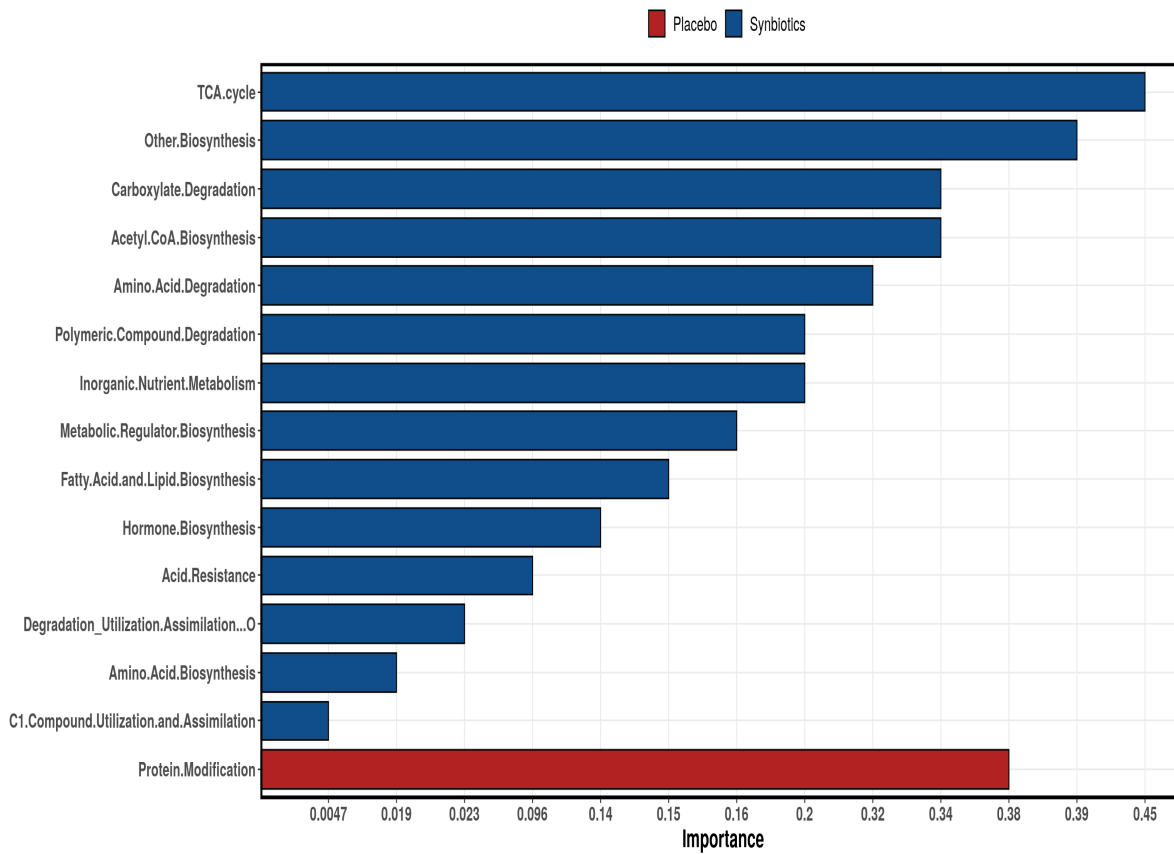

Supplement: s1 [file s1]
